# Supplementary material for: Hydroxy-Selenomethionine Mitigated Chronic Heat Stress-Induced Porcine Splenic Damage via Activation of Nrf2/Keap1 Signal and Suppression of NFκb and STAT Signal
Source: MDPI journal article supplement (doi:10.3390/ijms24076461), 2023-03-30
Supplement: s1 [file s1]

**Table S1.** Ingredients composition and nutrient levels of the basal diets

| Ingredients                  | Kg per ton |
|------------------------------|------------|
| Corn grain                   | 762        |
| Soybean oil                  | 28         |
| Soybean meal                 | 130        |
| Wheat bran                   | 40         |
| Fishmeal (CP 62.5 %)         | 14         |
| L-Lysine·hydrochloride       | 4.2        |
| DL-Methionie                 | 1.2        |
| L-Threonine                  | 1.4        |
| L-Tryptophan                 | 0.4        |
| Choline chloride 50%         | 1.0        |
| Calcium carbonate            | 8.5        |
| Calcium hydrophosphate       | 6.5        |
| Sodium chloride              | 1.8        |
| Premix <sup>a</sup>          | 1.0        |
| Total                        | 1000       |
| Nutrient levels <sup>b</sup> |            |
| Digestible energy (Kcal/kg)  | 3400       |
| Crude protein (%)            | 13.74      |
| Calcium (%)                  | 0.59       |
| STTD Phosphorus (%)          | 0.28       |
| SID Lysine (%)               | 0.85       |
| SID Met+cys (%)              | 0.48       |
| SID Thr (%)                  | 0.52       |
| SID Trp (%)                  | 0.15       |

<sup>a</sup> Premix provided per kilogram of diet: Fe, 50 mg; Cu, 3.5 mg; Zn, 50 mg; Mn, 2 mg; I, 0.14 mg; vitamin A, 1300 IU; vitamin D<sub>3</sub>, 150 IU; vitamin E, 11 mg; vitamin K<sub>3</sub>, 0.5 mg; vitamin B<sub>2</sub> 2 mg; vitamin B<sub>6</sub>, 1 mg; vitamin B<sub>12</sub>, 5 µg; pantothenic acid, 7 mg; folic acid, 0.3 mg; biotin 0.05 mg.

<sup>b</sup> Nutrient levels were calculated values. The basal diet was a standard experiment diet formulation used in our previous studies (1, 2).

**Table S2.** Primers used for the q-PCR of the target and reference genes

| Protein                      | Gene        | Accession number | Primer sequence (from 5' to 3') |
|------------------------------|-------------|------------------|---------------------------------|
| Selenoprotein encoding genes |             |                  |                                 |
| DIO1                         | <i>DIO1</i> | AY533206         | F: CATGGCCAAGAACCCTCACT         |

---

|         |                |                |                             |
|---------|----------------|----------------|-----------------------------|
|         |                |                | R: CCAGAAATACTGGGCACTGAAGA  |
| DIO2    | <i>DIO2</i>    | AY533207       | F: CGCTGCATCTGGAAGAGCTT     |
|         |                |                | R: TGGAATTGGGTGCATCTTCA     |
| DIO3    | <i>DIO3</i>    | AY533208       | F: TGAAGTGGAGCTCAACAGTGATG  |
|         |                |                | R: TGTCGTCAGACACGCAGATAGG   |
| GPX1    | <i>GPX1</i>    | AF532927       | F: GATGCCACTGCCCTCATGA      |
|         |                |                | R: TCGAAGTTCCATGCGATGTC     |
| GPX2    | <i>GPX2</i>    | DQ898282       | F: AGAATGTGGCCTCGCTCTGA     |
|         |                |                | R: GGCATTGCAGCTCGTTGAG      |
| GPX3    | <i>GPX3</i>    | AY368622       | F: CCGGTTCTGTTTTCCAAATT     |
|         |                |                | R: TGCACTGCAGGAAGAGTTTGAA   |
| GPX4    | <i>GPX4</i>    | NM_214407      | F: TGAGGCAAGACGGAGGTAAACT   |
|         |                |                | R: TCCGTAAACCACACTCAGCATATC |
| GPX6    | <i>GPX6</i>    | NM_001137607   | F: GAGCTGAAGCCTTTTGGTGTAGTT |
|         |                |                | R: CTTTGCTGGTTCTTGTTTTCCA   |
| MSRB1   | <i>MSRB1</i>   | EF113597       | F: ATCCCTAAAGGCCAAGAATCATC  |
|         |                |                | R: GGCCACCAAGCAGTGTTCA      |
| SELENOF | <i>SELENOF</i> | EF178474       | F: ACAGCCCTGCCAAGCAGAT      |
|         |                |                | R: AACAGGGAGGCTGGGTAACAC    |
| SELENOH | <i>SELENOH</i> | HM018602       | F: TGGTGGAGGAGCTGAAGAAGTAC  |
|         |                |                | R: CGTCATAAATGCTCCAACATCAC  |
| SELENOI | <i>SELENOI</i> | NM_001244662.1 | F: GATGGTGTGGATGGAAAGCAA    |
|         |                |                | R: GCCATGGTCAAAGAGTTCTCCTA  |
| SELENOK | <i>SELENOK</i> | DQ372075       | F: CAGGAAACCCCCCTAGAAGAA    |
|         |                |                | R: CTCATCCACCGGCCATTG       |
| SELENOM | <i>SELENOM</i> | FJ968780       | F: CAGCTGAATCGCCTCAAAGAG    |
|         |                |                | R: GAGATGTTTCATGACCAGGTTGTG |
| SELENON | <i>SELENON</i> | EF113595       | F: ACCTGGTCCCTGGTGAAAGAG    |
|         |                |                | R: AGGCCAGCCAGCTTCTTGT      |

---

|                                            |                               |                |                                                          |
|--------------------------------------------|-------------------------------|----------------|----------------------------------------------------------|
| SELENOO                                    | <i>SELENOO</i>                | AK236851       | F: CTTCCGACCCCAGATGGAT<br>R: GGTTCGACTGTGCCAGCAT         |
| SELENOP                                    | <i>SELENOP</i>                | EF113596       | F: AACCAGAAGCGCCAGACACT<br>R: TGCTGGCATATCTCAGTTCTCAGA   |
| SELENOS                                    | <i>SELENOS</i>                | AY609646       | F: GAGGCAGAGGCACCTGGAT<br>R: CTGCTAAAGCCTCCTGTCGTTT      |
| SELENOT                                    | <i>SELENOT</i>                | AY609428       | F: GGCTTAATAATCGTTGGCAAAGA<br>R: TGGCCCCATTGCCAGATA      |
| SELENOV                                    | <i>SELENOV</i>                | GQ478346       | F: CACTGGTCGCCAATGGATTCT<br>R: AGTGGCCAACGGAGAAAAGC      |
| SELENOW                                    | <i>SELENOW</i>                | NM_213977      | F: CACCCCTGTCTCCCTGCAT<br>R: GAGCAGGATCACCCCAAACA        |
| SEPHS2                                     | <i>SEPHS2</i>                 | EF033624       | F: TGGCTTGATGCACACGTTTAA<br>R: TGCGAGTGTCCCAGAATGC       |
| TXNRD1                                     | <i>TXNRD1</i>                 | AF537300       | F: GATTTAACAAGCGGGTCATGGT<br>R: CAACCTACATTACACACGTTTCCT |
| TXNRD2                                     | <i>TXNRD2</i>                 | GU181287       | F: TCTTGAAAGGCGGAAAAGAGAT<br>R: TCGGTCGCCCTCCAGTAG       |
| TXNRD3                                     | <i>TXNRD3</i>                 | BX918808       | F: GTGCCCTACGTTTATGCTGTTG<br>R: TCCGAGCCACCAGCTTTG       |
| <b>Inflammatory response-related genes</b> |                               |                |                                                          |
| IL-1 $\beta$                               | <i>IL-1<math>\beta</math></i> | NM_001252429.1 | F: TCTGCCCTGTACCCCAACTG<br>R: CCAGGAAGACGGGCTTTTG        |
| IL-6                                       | <i>IL-6</i>                   | NM_213867.1    | F: ATGCTTCCAATCTGGGTTCAA<br>R: CACAAGACCGGTGGTGATTCT     |
| IL-8                                       | <i>IL-8</i>                   | NM_214041.1    | F: GCAAGAGTAAGTGCAGAACTTCGA<br>R: GGGTGGAAGGTGTGGAATG    |
| IL-10                                      | <i>IL-10</i>                  | NM_214022.1    | F: CAGATGGGCGACTTGTTGCT<br>R: GGCAACCCAGGTAACCCTTAA      |

|                                   |                                 |                |                                                        |
|-----------------------------------|---------------------------------|----------------|--------------------------------------------------------|
| TNF- $\alpha$                     | <i>TNF-<math>\alpha</math></i>  | NM_214015.1    | F: CGACTCAGTGCCGAGATCAA<br>R: CCTGCCCAGATTCAGCAAAG     |
| TGF- $\beta$                      | <i>TGF-<math>\beta</math></i>   | JN391525.1     | F: AGGACCTGGGCTGGAAGTG<br>R: GGGCCCCAGGCAGAAAT         |
| IFN- $\beta$                      | <i>IFN-<math>\beta</math></i>   | NM_213816.1    | F: TCTCTAGCACTGGCTGGAATGA<br>R: CTGCCCATCAAGTTCCACAA   |
| ICAM-1                            | <i>ICAM-1</i>                   | NM_214214.1    | F: GGAGGTGCTGAAATCTCAATGTG<br>R: ACCTTCATGGAGCCTCCTTTG |
| MCP-1                             | <i>MCP-1</i>                    | NM_001252429.1 | F: GCAAGTGCCTAAAGAAGCAGTGA<br>R: GCTTGGGTTCTGCACAGATCT |
| <b>Heat shock protein</b>         |                                 |                |                                                        |
| HSP70                             | <i>HSP70</i>                    | NM_001123127.1 | F: TTGGGCGCAAGTTTGCA<br>R: GGAAAGGCCAGTGCTTCAAG        |
| <b>Housekeeping control genes</b> |                                 |                |                                                        |
| $\beta$ -ACTIN                    | <i><math>\beta</math>-ACTIN</i> | NM_007393.5    | F: ACCAGTTCGCCATGGATGAC<br>R: TGCCGGAGCCGTTGTC         |
| GAPDH                             | <i>GAPDH</i>                    | GU214026.1     | F: GGGAAGCCCATCACCATCT<br>R: CGGCCTCACCCCATTG          |

The primer used were same as our previous studies (1,2)

**Table S3.** Primary and secondary antibody information used for the western blot analysis

| Primary antibody | Dilution | Source      | Identifier | secondary antibody | Dilution | Identifier |
|------------------|----------|-------------|------------|--------------------|----------|------------|
| HSP70            | 1:1000   | abcam       | Ab5439     | M <sup>1</sup>     | 1:10000  | ab96879    |
| Nrf2             | 1:1000   | Proteintech | 66504-1-Ig | M                  | 1:10000  | ab96879    |
| Keap1            | 1:1000   | Proteintech | 60027-1-Ig | M                  | 1:10000  | ab96879    |
| HO-1             | 1:500    | Proteintech | 27282-1-AP | R <sup>2</sup>     | 1:20000  | ab182016   |
| NQO1             | 1:1000   | Proteintech | 11451-1-AP | R                  | 1:20000  | ab182016   |
| Caspase3         | 1:500    | Proteintech | 19677-1-AP | R                  | 1:20000  | ab182016   |

|         |        |                              |            |   |         |          |
|---------|--------|------------------------------|------------|---|---------|----------|
| Bcl-2   | 1:2000 | Proteintech                  | 12789-1-AP | R | 1:20000 | ab182016 |
| Bax     | 1:5000 | Proteintech                  | 60267-1-Ig | M | 1:10000 | ab96879  |
| p-NFκB  | 1:1000 | Cell signaling<br>technology | #3033      | R | 1:20000 | ab182016 |
| NFκB    | 1:1000 | Cell signaling<br>technology | #6956      | R | 1:20000 | ab182016 |
| p-IκB   | 1:1000 | Cell signaling<br>technology | #6246      | R | 1:20000 | ab182016 |
| IκB     | 1:1000 | Cell signaling<br>technology | #4814      | R | 1:20000 | ab182016 |
| p-p38   | 1:1000 | Cell signaling<br>technology | #4511      | R | 1:20000 | ab182016 |
| p38     | 1:1000 | Cell signaling<br>technology | #8690      | R | 1:20000 | ab182016 |
| p-Stat1 | 1:1000 | Cell signaling<br>technology | #9167      | R | 1:20000 | ab182016 |
| Stat1   | 1:1000 | Cell signaling<br>technology | #14994     | R | 1:20000 | ab182016 |
| p-Stat3 | 1:1000 | Cell signaling<br>technology | #9138      | R | 1:20000 | ab182016 |
| Stat3   | 1:1000 | Cell signaling<br>technology | #9139      | R | 1:20000 | ab182016 |
| GPX1    | 1:1000 | abcam                        | Ab22604    | R | 1:20000 | ab182016 |
| GPX3    | 1:500  | Santa Cruz<br>Biotechnology  | Sc-58361   | M | 1:10000 | ab96879  |
| GPX4    | 1:500  | Zen Bio                      | 381958     | R | 1:20000 | ab182016 |
| SELENOS | 1:1000 | Proteintech                  | 15591-1-AP | R | 1:20000 | ab182016 |
| SELENOF | 1:1000 | Zen Bio                      | 823841     | R | 1:20000 | ab182016 |
| β-actin | 1:5000 | Millipore                    | MAB1501    | M | 1:10000 | ab96879  |

<sup>1</sup> M: Goat Anti-Mouse IgG H&L.

<sup>2</sup> R: Goat Anti-Rabbit IgG H&L

## REFERENCE

1. He Y, Liu Y, Tang J, Jia G, Liu G, Tian G, et al. Selenium Exerts Protective Effects against Heat Stress-Induced Barrier Disruption and Inflammation Response in Jejunum of Growing Pigs. *Journal of the science of food and agriculture* (2021) 102(2):496-504. doi: 10.1002/jsfa.11377.
2. Liu Y, Yin S, Tang J, Liu Y, Jia G, Liu G, et al. Hydroxy Selenomethionine Improves Meat Quality through Optimal Skeletal Metabolism and Functions of Selenoproteins of Pigs under Chronic Heat Stress. *Antioxidants (Basel, Switzerland)* (2021) 10(10). doi: 10.3390/antiox10101558.
